# Supplementary material for: COVID-19 risk perceptions of social interaction and essential activities and inequity in the USA: results from a nationally representative survey
Source: HighWire-hosted journal article supplement (doi:10.1136/bmjopen-2021-051882), 2022-02-01
Supplement: bmjopen-2021-051882supp001_data_supplement.pdf [file bmjopen-2021-051882supp001_data_supplement.pdf]

### Supplementary Figure 1: Risk perceptions questionnaire module

\* 22. How **safe or unsafe** do you think the following activities are in terms of your getting COVID-19 or giving it to someone else?

|                                                         | Extremely Safe        | Somewhat Safe         | Somewhat Unsafe       | Extremely Unsafe      | Unsure                | Prefer not to say     |
|---------------------------------------------------------|-----------------------|-----------------------|-----------------------|-----------------------|-----------------------|-----------------------|
| Going to the <b>grocery store</b> ?                     | <input type="radio"/> | <input type="radio"/> | <input type="radio"/> | <input type="radio"/> | <input type="radio"/> | <input type="radio"/> |
| Attending a <b>gathering of more than 10 people</b> ?   | <input type="radio"/> | <input type="radio"/> | <input type="radio"/> | <input type="radio"/> | <input type="radio"/> | <input type="radio"/> |
| Attending a <b>gathering of more than 100 people</b> ?  | <input type="radio"/> | <input type="radio"/> | <input type="radio"/> | <input type="radio"/> | <input type="radio"/> | <input type="radio"/> |
| Going to the <b>doctor's office</b> ?                   | <input type="radio"/> | <input type="radio"/> | <input type="radio"/> | <input type="radio"/> | <input type="radio"/> | <input type="radio"/> |
| Going to the <b>emergency room</b> ?                    | <input type="radio"/> | <input type="radio"/> | <input type="radio"/> | <input type="radio"/> | <input type="radio"/> | <input type="radio"/> |
| Going to the <b>dentist</b> ?                           | <input type="radio"/> | <input type="radio"/> | <input type="radio"/> | <input type="radio"/> | <input type="radio"/> | <input type="radio"/> |
| Going to <b>church</b> for a religious service/ceremony | <input type="radio"/> | <input type="radio"/> | <input type="radio"/> | <input type="radio"/> | <input type="radio"/> | <input type="radio"/> |

\* 23. How **safe or unsafe** do you think the following activities are in terms of your getting COVID-19 or giving it to someone else?

|                                                                                   | Extremely Safe        | Somewhat Safe         | Somewhat Unsafe       | Extremely Unsafe      | Unsure                | Prefer not to say     |
|-----------------------------------------------------------------------------------|-----------------------|-----------------------|-----------------------|-----------------------|-----------------------|-----------------------|
| <b>Returning to work</b> as before the outbreak?                                  | <input type="radio"/> | <input type="radio"/> | <input type="radio"/> | <input type="radio"/> | <input type="radio"/> | <input type="radio"/> |
| <b>Dining outdoors</b> at restaurants?                                            | <input type="radio"/> | <input type="radio"/> | <input type="radio"/> | <input type="radio"/> | <input type="radio"/> | <input type="radio"/> |
| <b>Dining indoors</b> at restaurants?                                             | <input type="radio"/> | <input type="radio"/> | <input type="radio"/> | <input type="radio"/> | <input type="radio"/> | <input type="radio"/> |
| <b>Visiting friends or relatives</b> in their homes and staying <b>indoors</b> ?  | <input type="radio"/> | <input type="radio"/> | <input type="radio"/> | <input type="radio"/> | <input type="radio"/> | <input type="radio"/> |
| <b>Visiting friends or relatives</b> in their homes and staying <b>outdoors</b> ? | <input type="radio"/> | <input type="radio"/> | <input type="radio"/> | <input type="radio"/> | <input type="radio"/> | <input type="radio"/> |
| Visiting <b>elderly</b> relatives?                                                | <input type="radio"/> | <input type="radio"/> | <input type="radio"/> | <input type="radio"/> | <input type="radio"/> | <input type="radio"/> |
