# Supplementary material for: COVID-19 risk perceptions of social interaction and essential activities and inequity in the USA: results from a nationally representative survey
Source: HighWire-hosted journal article supplement (doi:10.1136/bmjopen-2021-051882), 2022-02-01
Supplement: bmjopen-2021-051882supp003_data_supplement.pdf [file bmjopen-2021-051882supp003_data_supplement.pdf]

**Supplementary Figure 2: Adjusted odds ratios of perceiving large gatherings and activities in public as unsafe for participants stratified by race**

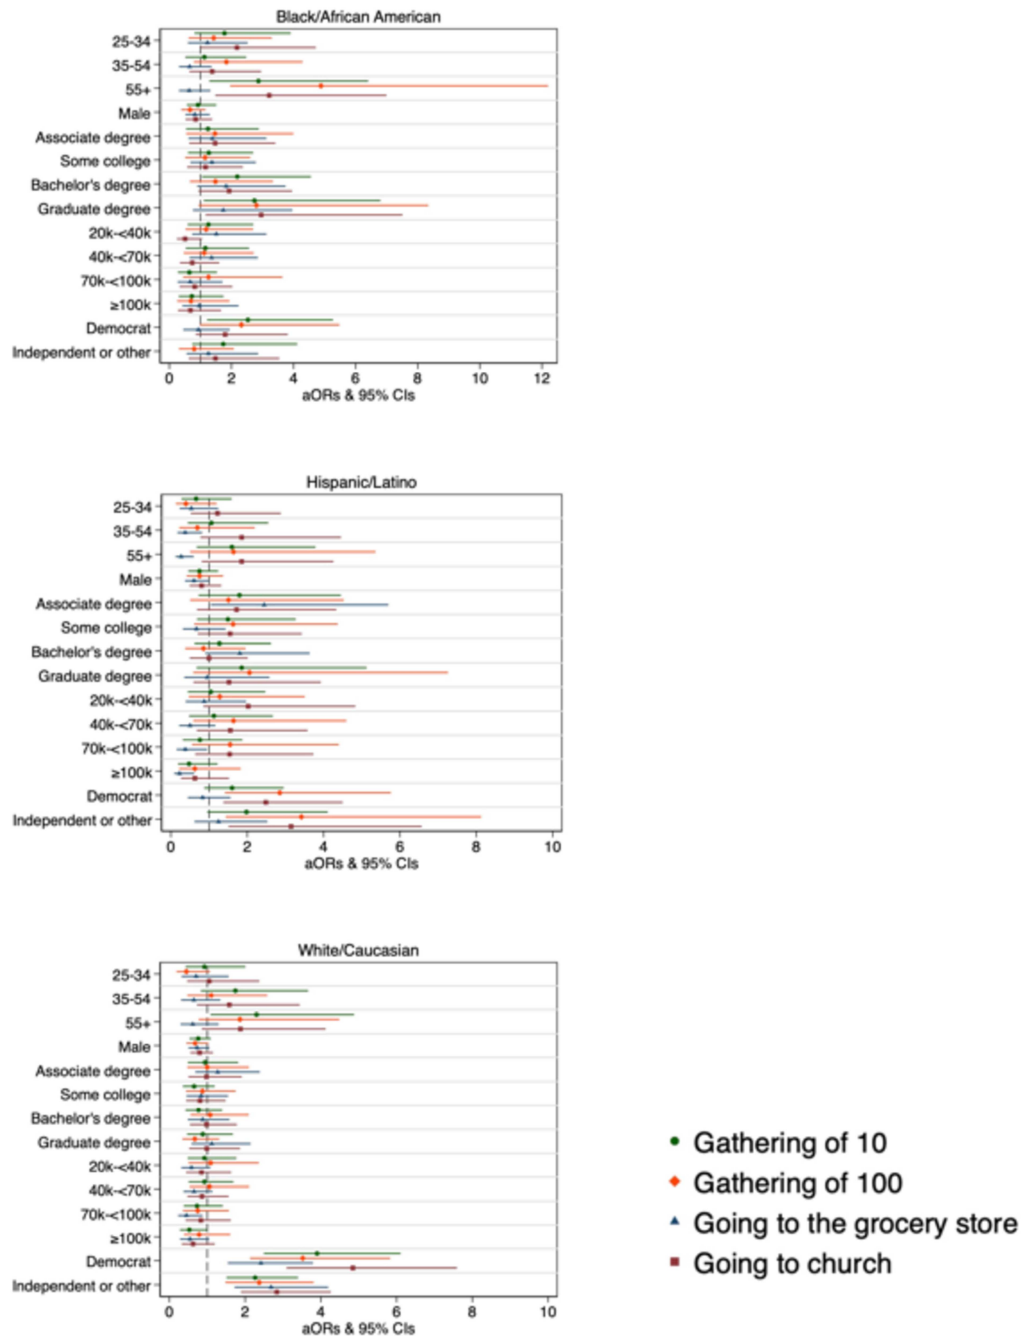

### Adjusted odds ratios of perceiving indoor and outdoor dining and visits with friends and relatives as unsafe participants stratified by race

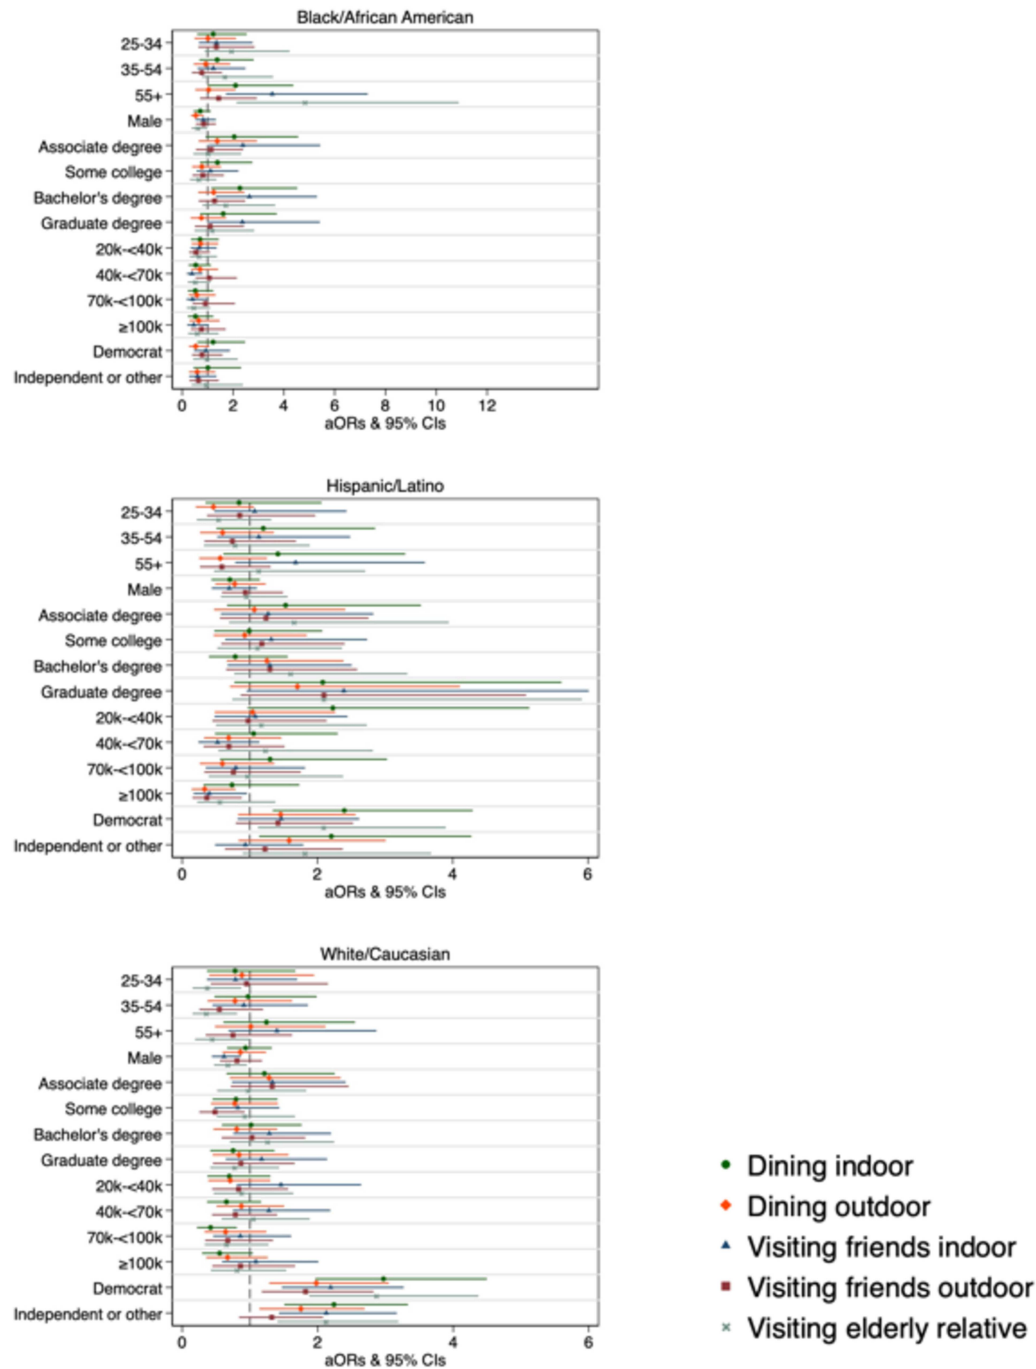

### Adjusted odds ratios of perceiving medical visits and returning to work as unsafe for participants stratified by race

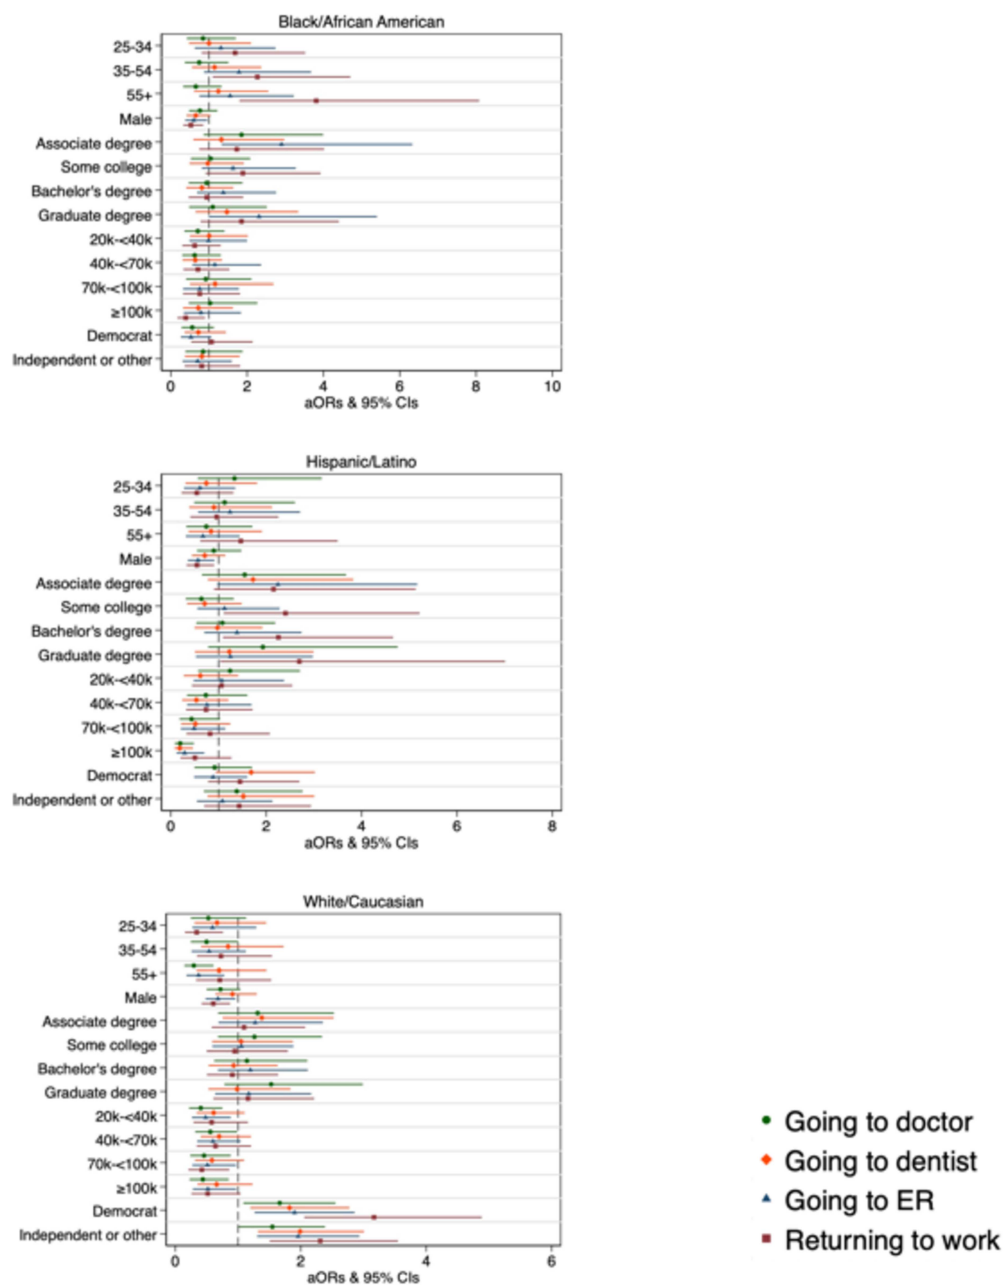

**Supplementary figure 2:** Reference groups are age: 18-24, gender: female, education: high school or less, income: <\$20,000, political party: republican.
